# Supplementary material
Source: MDPI journal article supplement (https://www.mdpi.com/2077-0472/11/4/354)
Supplement: s1 [file s1]

**Rootstocks obtained by the Citrus Breeding Program of Embrapa Cassava & Fruits registered<sup>1</sup> or under registration<sup>2</sup> in the Ministry of Agriculture, Livestock and Food Supply, Brazil.**

| <b>Crossing code</b>    | <b>Registration name</b>        | <b>Classification by the induced tree size*</b> |
|-------------------------|---------------------------------|-------------------------------------------------|
| HTR - 206               | BRS Bandeirante <sup>1</sup>    | Super-standard                                  |
| HTR - 207               | BRS J B Forner <sup>2</sup>     | Semi-dwarfing                                   |
| HTR - 208               | BRS HLeão <sup>1</sup>          | Super-standard                                  |
| TSKC x CTTR - 029       | BRS D Giacometti <sup>2</sup>   | Semi-dwarfing                                   |
| TSKC x TRBK - 006       | BRS Ody R <sup>1</sup>          | Dwarfing                                        |
| TSKC x TRFD - 003       | BRS Donadio <sup>1</sup>        | Dwarfing                                        |
| TSKC x TRFD - 006       | BRS Matta <sup>1</sup>          | Dwarfing                                        |
| TSKC x TRFD - 007       | BRS J Furr <sup>1</sup>         | Dwarfing                                        |
| TSKFL x CTARG - 029     | BRS P Ollitrault <sup>1</sup>   | Semi-standard                                   |
| TSKFL x CTSW - 004      | BRS O Sempionato <sup>1</sup>   | Standard                                        |
| TSKFL x CTTR - 017      | BRS Dornelles <sup>2</sup>      | Dwarfing                                        |
| TSKC x CTQT1439 - 003   | BRS G Müller <sup>2</sup>       | Semi-standard                                   |
| TSKC x CTQT1439 - 014   | BRS L Navarro <sup>1</sup>      | Semi-standard                                   |
| TSKC x (LCR x TR) - 016 | BRS Amaro <sup>2</sup>          | Dwarfing                                        |
| TSKC x (LCR x TR) - 040 | BRS Tabuleiro <sup>2</sup>      | Semi-standard                                   |
| LRF x (LCR x TR) - 004  | BRS Bill Castle <sup>2</sup>    | Semi-standard                                   |
| LCR x CTSW - 009        | BRS S Moreira <sup>1</sup>      | Standard                                        |
| LCR x LRF - 034         | BRS G Souza Vieira <sup>2</sup> | Standard                                        |

\*According to the classification proposed by Castle and Philips (1977).
